# Supplementary material
Source: Research Square preprint supplement (doi:10.21203/rs.3.rs-8969133/v1)
Supplement: Supplementary file 2 [file 9b42ebea7eb11273ffa6ebe5.docx]

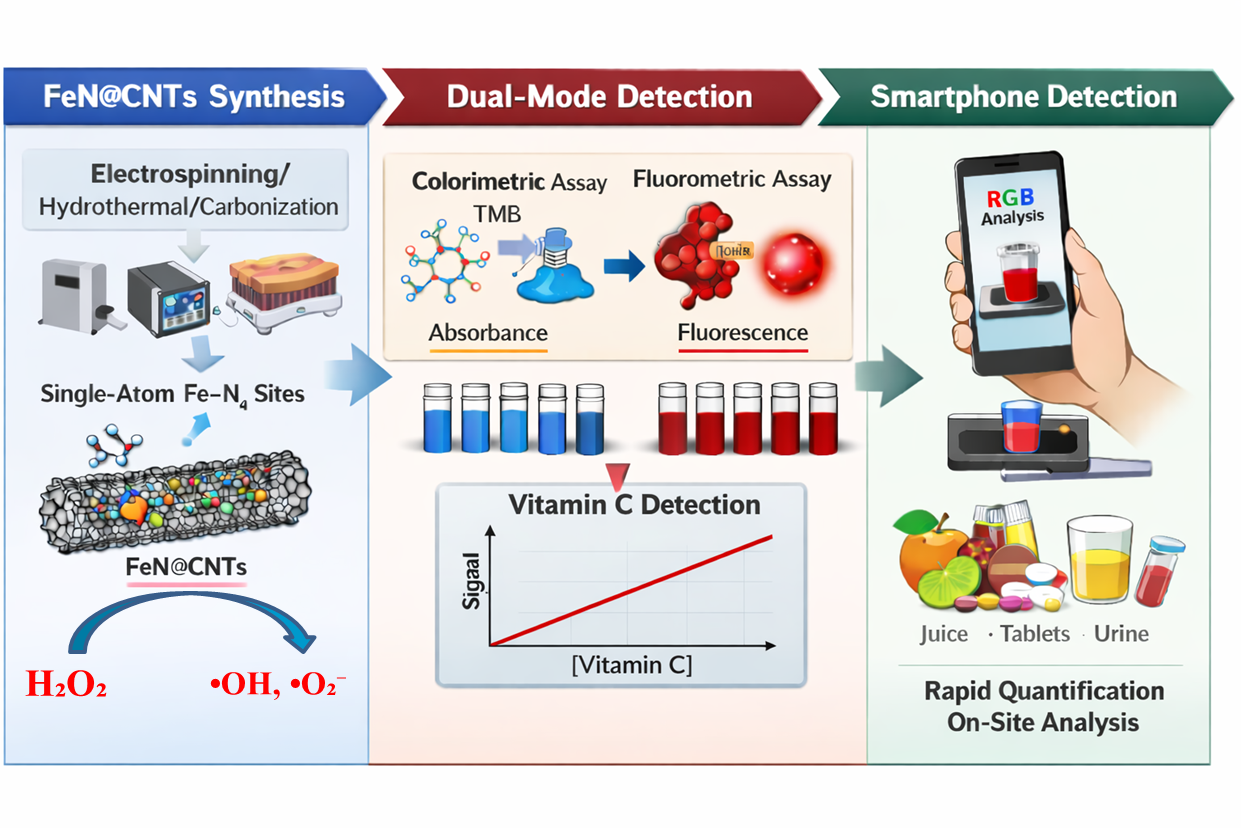


**Scheme 1** Schematic diagram for preparation of FeN@CNTs nanozyme for multimode detection of vitamin C.
